# Supplementary material
Source: ML conference proceedings conference paper supplement (https://proceedings.neurips.cc/paper_files/paper/2014/hash/69ed889b47b731892f80016959f16ca0-Abstract.html)
Supplement: Supplementary file 1 [file 69ed889b47b731892f80016959f16ca0-Supplemental.zip]

## 8 Appendix

**Lemma 2.** The function  $g : \gamma \mapsto \frac{\log \frac{1}{\gamma}}{1-\gamma}$  is decreasing over the interval  $(0, 1)$ .

*Proof.* This can be straightforwardly established:

$$g'(\gamma) = \frac{-\frac{1-\gamma}{\gamma} + \log \frac{1}{\gamma}}{(1-\gamma)^2} = \frac{\gamma \log(1 - [1 - \frac{1}{\gamma}]) - (1-\gamma)}{\gamma(1-\gamma)^2} < \frac{(1-\gamma) - (1-\gamma)}{\gamma(1-\gamma)^2} = 0,$$

using the inequality  $\log(1-x) < -x$  valid for all  $x < 0$ .  $\square$

**Lemma 3.** Let  $a \geq 0$  and let  $g : D \subset \mathbb{R} \rightarrow [a, \infty)$  be a decreasing and differentiable function. Then, the function  $F : \mathbb{R} \rightarrow \mathbb{R}$  defined by

$$F(\gamma) = g(\gamma) - \sqrt{g(\gamma)^2 - b}$$

is increasing for all values of  $b \in [0, a]$ .

*Proof.* We will show that  $F'(\gamma) \geq 0$  for all  $\gamma \in D$ . Since  $F' = g'[1 - g(g^2 - b)^{-1/2}]$  and  $g' \leq 0$  by hypothesis, the previous statement is equivalent to showing that  $\sqrt{g^2 - b} \leq g$  which is trivially verified since  $b \geq 0$ .  $\square$

**Theorem 1.** Let  $1/2 < \gamma < \gamma_0 < 1$  and  $r^* = \left\lceil \operatorname{argmin}_{r \geq 1} r + \frac{\gamma_0^r T}{(1-\gamma_0)(1-\gamma_0^r)} \right\rceil$ . For any  $v \in [0, 1]$ , if  $T > 4$ , the regret of  $\text{PFS}_{r^*}$  satisfies

$$\text{Reg}(\text{PFS}_{r^*}, v) \leq (2v\gamma_0 T_{\gamma_0} \log cT + 1 + v)(\log_2 \log_2 T + 1) + 4T_{\gamma_0},$$

where  $c = 4 \log 2$ .

*Proof.* It is not hard to verify that the function  $r \mapsto r + \frac{\gamma_0^r T}{(1-\gamma_0)(1-\gamma_0^r)}$  is convex and approaches infinity as  $r \rightarrow \infty$ . Thus, it admits a minimizer  $\bar{r}^*$  whose explicit expression can be found by solving the following equation

$$0 = \frac{d}{dr} \left( r + \frac{\gamma_0^r T}{(1-\gamma_0)(1-\gamma_0^r)} \right) = 1 + \frac{\gamma_0^r T \log \gamma_0}{(1-\gamma_0)(1-\gamma_0^r)^2}.$$

Solving the corresponding second-degree equation yields

$$\gamma_0^{\bar{r}^*} = \frac{2 + \frac{T \log(1/\gamma_0)}{1-\gamma_0} - \sqrt{\left(2 + \frac{T \log(1/\gamma_0)}{1-\gamma_0}\right)^2 - 4}}{2} =: F(\gamma_0).$$

By Lemmas 2 and 3, the function  $F$  thereby defined is increasing. Therefore,  $\gamma_0^{\bar{r}^*} \leq \lim_{\gamma_0 \rightarrow 1} F(\gamma_0)$  and

$$\gamma_0^{\bar{r}^*} \leq \frac{2 + T - \sqrt{(2+T)^2 - 4}}{2} = \frac{4}{2(2+T + \sqrt{(2+T)^2 - 4})} \leq \frac{2}{T}. \quad (8)$$

By the same argument, we must have  $\gamma_0^{\bar{r}^*} \geq F(1/2)$ , that is

$$\begin{aligned} \gamma_0^{\bar{r}^*} \geq F(1/2) &= \frac{2 + 2T \log 2 - \sqrt{(2 + 2T \log 2)^2 - 4}}{2} \\ &= \frac{4}{2(2 + 2T \log 2 + \sqrt{(2 + 2T \log 2)^2 - 4})} \\ &\geq \frac{2}{4 + 4T \log 2} \geq \frac{1}{4T \log 2}. \end{aligned}$$

Thus,

$$r^* = \lceil \bar{r}^* \rceil \leq \frac{\log(1/F(1/2))}{\log(1/\gamma_0)} + 1 \leq \frac{\log(4T \log 2)}{\log 1/\gamma_0} + 1. \quad (9)$$

Combining inequalities (8) and (9) with (7) gives

$$\begin{aligned} \text{Reg}(\text{PFS}_{r^*}, v) &\leq \left( v \frac{\log(4T \log 2)}{\log 1/\gamma_0} + 1 + v \right) (\lceil \log_2 \log_2 T \rceil + 1) + \frac{(1 + \gamma_0)T}{(1 - \gamma_0)(T - 2)} \\ &\leq (2v\gamma_0 T \log(cT) + 1 + v)(\lceil \log_2 \log_2 T \rceil + 1) + 4T_{\gamma_0}, \end{aligned}$$

using the inequality  $\log(\frac{1}{\gamma}) \geq \frac{1-\gamma}{2\gamma}$  valid for all  $\gamma \in (1/2, 1)$ .  $\square$

### 8.1 Lower bound for monotone algorithms

**Lemma 4.** *Let  $(p_t)_{t=1}^T$  be a decreasing sequence of prices. Assume that the seller faces a truthful buyer. Then, if  $v$  is sampled uniformly at random in the interval  $[\frac{1}{2}, 1]$ , the following inequality holds:*

$$\mathbb{E}[\kappa^*] \geq \frac{1}{32\mathbb{E}[v - p_{\kappa^*}]}.$$

*Proof.* Since the buyer is truthful,  $\kappa^*(v) = \kappa$  if and only if  $v \in [p_\kappa, p_{\kappa-1}]$ . Thus, we can write

$$\mathbb{E}[v - p_{\kappa^*}] = \sum_{\kappa=2}^{\kappa_{\max}} \mathbb{E}[\mathbb{1}_{v \in [p_\kappa, p_{\kappa-1}]}(v - p_\kappa)] = \sum_{\kappa=2}^{\kappa_{\max}} \int_{p_\kappa}^{p_{\kappa-1}} (v - p_\kappa) dv = \sum_{\kappa=2}^{\kappa_{\max}} \frac{(p_{\kappa-1} - p_\kappa)^2}{2},$$

where  $\kappa_{\max} = \kappa^*(\frac{1}{2})$ . Thus, by the Cauchy-Schwarz inequality, we can write

$$\begin{aligned} \mathbb{E}\left[\sum_{\kappa=2}^{\kappa^*} p_{\kappa-1} - p_\kappa\right] &\leq \mathbb{E}\left[\sqrt{\kappa^* \sum_{\kappa=2}^{\kappa^*} (p_{\kappa-1} - p_\kappa)^2}\right] \\ &\leq \mathbb{E}\left[\sqrt{\kappa^* \sum_{\kappa=2}^{\kappa_{\max}} (p_{\kappa-1} - p_\kappa)^2}\right] \\ &= \mathbb{E}\left[\sqrt{2\kappa^* \mathbb{E}[v - p_{\kappa^*}]}\right] \\ &\leq \sqrt{\mathbb{E}[\kappa^*]} \sqrt{2\mathbb{E}[v - p_{\kappa^*}]}, \end{aligned}$$

where the last step holds by Jensen's inequality. In view of that, since  $v > p_{\kappa^*}$ , it follows that:

$$\frac{3}{4} = \mathbb{E}[v] \geq \mathbb{E}[p_{\kappa^*}] = \mathbb{E}\left[\sum_{\kappa=2}^{\kappa^*} p_\kappa - p_{\kappa-1}\right] + p_1 \geq -\sqrt{\mathbb{E}[\kappa^*]} \sqrt{2\mathbb{E}[v - p_{\kappa^*}]} + 1.$$

Solving for  $\mathbb{E}[\kappa^*]$  concludes the proof.  $\square$

The following lemma characterizes the value of  $\kappa^*$  when facing a strategic buyer.

**Lemma 5.** *For any  $v \in [0, 1]$ ,  $\kappa^*$  satisfies  $v - p_{\kappa^*} \geq C_\gamma^{\kappa^*} (p_{\kappa^*} - p_{\kappa^*+1})$  with  $C_\gamma^{\kappa^*} = \frac{\gamma - \gamma^{T - \kappa^* + 1}}{1 - \gamma}$ . Furthermore, when  $\kappa^* \leq 1 + \sqrt{T_\gamma T}$  and  $T \geq T_\gamma + \frac{2 \log(2/\gamma)}{\log(1/\gamma)}$ ,  $C_\gamma^{\kappa^*}$  can be replaced by the universal constant  $C_\gamma = \frac{\gamma}{2(1-\gamma)}$ .*

*Proof.* Since an optimal strategy is played by the buyer, the surplus obtained by accepting a price at time  $\kappa^*$  must be greater than the corresponding surplus obtained when accepting the first price at time  $\kappa^* + 1$ . It thus follows that:

$$\begin{aligned} \sum_{t=\kappa^*}^T \gamma^{t-1} (v - p_{\kappa^*}) &\geq \sum_{t=\kappa^*+1}^T \gamma^{t-1} (v - p_{\kappa^*+1}) \\ \Rightarrow \gamma^{\kappa^*-1} (v - p_{\kappa^*}) &\geq \sum_{t=\kappa^*+1}^T \gamma^{t-1} (p_{\kappa^*} - p_{\kappa^*+1}) = \frac{\gamma^{\kappa^*} - \gamma^T}{1 - \gamma} (p_{\kappa^*} - p_{\kappa^*+1}). \end{aligned}$$

Dividing both sides of the inequality by  $\gamma^{\kappa^*-1}$  yields the first statement of the lemma. Let us verify the second statement. A straightforward calculation shows that the conditions on  $T$  imply  $T - \sqrt{T T_\gamma} \geq \frac{\log(2/\gamma)}{\log(1/\gamma)}$ , therefore

$$C_\gamma^{\kappa^*} \geq \frac{\gamma - \gamma^{T - \sqrt{T T_\gamma}}}{1 - \gamma} \geq \frac{\gamma - \gamma^{\frac{\log(2/\gamma)}{\log(1/\gamma)}}}{1 - \gamma} = \frac{\gamma - \frac{\gamma}{2}}{1 - \gamma} = \frac{\gamma}{2(1 - \gamma)}.$$

□

**Proposition 5.** *For any convex decreasing sequence  $(p_t)_{t=1}^T$ , if  $T \geq T_\gamma + \frac{2 \log(2/\gamma)}{\log(1/\gamma)}$ , then there exists a valuation  $v_0 \in [\frac{1}{2}, 1]$  for the buyer such that*

$$\text{Reg}(\mathcal{A}_m, v_0) \geq \max \left( \frac{1}{8} \sqrt{T - \sqrt{T T_\gamma}}, \sqrt{C_\gamma (T - \sqrt{T T_\gamma}) \left( \frac{1}{2} - \sqrt{\frac{C_\gamma}{T}} \right)} \right) = \Omega(\sqrt{T} + \sqrt{C_\gamma T}).$$

*Proof.* In view of Proposition 1, we only need to verify that there exists  $v_0 \in [\frac{1}{2}, 1]$  such that

$$\text{Reg}(\mathcal{A}_m, v_0) \geq \sqrt{C_\gamma (T - \sqrt{T T_\gamma}) \left( \frac{1}{2} - \sqrt{\frac{C_\gamma}{T}} \right)}.$$

Let  $\kappa_{\min} = \kappa^*(1)$ , and  $\kappa_{\max} = \kappa^*(\frac{1}{2})$ . If  $\kappa_{\min} > 1 + \sqrt{T T_\gamma}$ , then  $\text{Reg}(\mathcal{A}_m, 1) \geq 1 + \sqrt{T T_\gamma}$ , from which the statement of the proposition can be derived straightforwardly. Thus, in the following we will only consider the case  $\kappa_{\min} \leq 1 + \sqrt{T T_\gamma}$ . Since, by definition, the inequality  $\frac{1}{2} \geq p_{\kappa_{\max}}$  holds, we can write

$$\frac{1}{2} \geq p_{\kappa_{\max}} = \sum_{\kappa=\kappa_{\min}+1}^{\kappa_{\max}} (p_\kappa - p_{\kappa-1}) + p_{\kappa_{\min}} \geq \kappa_{\max}(p_{\kappa_{\min}+1} - p_{\kappa_{\min}}) + p_{\kappa_{\min}},$$

where the last inequality holds by the convexity of the sequence and the fact that  $p_{\kappa_{\min}} - p_{\kappa_{\min}-1} \leq 0$ . The inequality is equivalent to  $p_{\kappa_{\min}} - p_{\kappa_{\min}+1} \geq \frac{p_{\kappa_{\min}} - \frac{1}{2}}{\kappa_{\max}}$ . Furthermore, by Lemma 5, we have

$$\begin{aligned} \max_{v \in [\frac{1}{2}, 1]} \text{Reg}(\mathcal{A}_m, v) &\geq \max(\kappa_{\max}, (T - \kappa_{\min})(p_{\kappa_{\min}} - p_{\kappa_{\min}+1})) \\ &\geq \max \left( \kappa_{\max}, C_\gamma \frac{(T - \kappa_{\min})(p_{\kappa_{\min}} - \frac{1}{2})}{\kappa_{\max}} \right). \end{aligned}$$

The right-hand side is minimized for  $\kappa_{\max} = \sqrt{C_\gamma (T - \kappa_{\min})(p_{\kappa_{\min}} - \frac{1}{2})}$ . Thus, there exists a valuation  $v_0$  for which the following inequality holds:

$$\text{Reg}(\mathcal{A}_m, v_0) \geq \sqrt{C_\gamma (T - \kappa_{\min}) \left( p_{\kappa_{\min}} - \frac{1}{2} \right)} \geq \sqrt{C_\gamma (T - \sqrt{T T_\gamma}) \left( p_{\kappa_{\min}} - \frac{1}{2} \right)}.$$

Furthermore, we can assume that  $p_{\kappa_{\min}} \geq 1 - \sqrt{\frac{C_\gamma}{T}}$  otherwise  $\text{Reg}(\mathcal{A}_m, 1) \geq (T - 1)\sqrt{C_\gamma/T}$ , which is easily seen to imply the desired lower bound. Thus, there exists a valuation  $v_0$  such that

$$\text{Reg}(\mathcal{A}_m, v_0) \geq \sqrt{C_\gamma (T - \sqrt{T T_\gamma}) \left( \frac{1}{2} - \sqrt{\frac{C_\gamma}{T}} \right)},$$

which concludes the proof. □

## 9 Simulations

Here, we present the results of more extensive simulations for  $\text{PFS}_r$  and the `monotone` algorithm. Again, we consider two different scenarios. Figure 3 shows the experimental results for an agnostic scenario where the value of the parameter  $\gamma$  remains unknown to both algorithms and where the parameter  $r$  of  $\text{PFS}_r$  is set to  $\log(T)$ . The results reported in Figure 4 correspond to the second scenario where the discounting factor  $\gamma$  is known to the algorithms and where the parameter  $\beta$  for the `monotone` algorithm is set to  $1 - 1/\sqrt{T T_\gamma}$ . The scale on the plots is logarithmic in the number of rounds and in the regret.

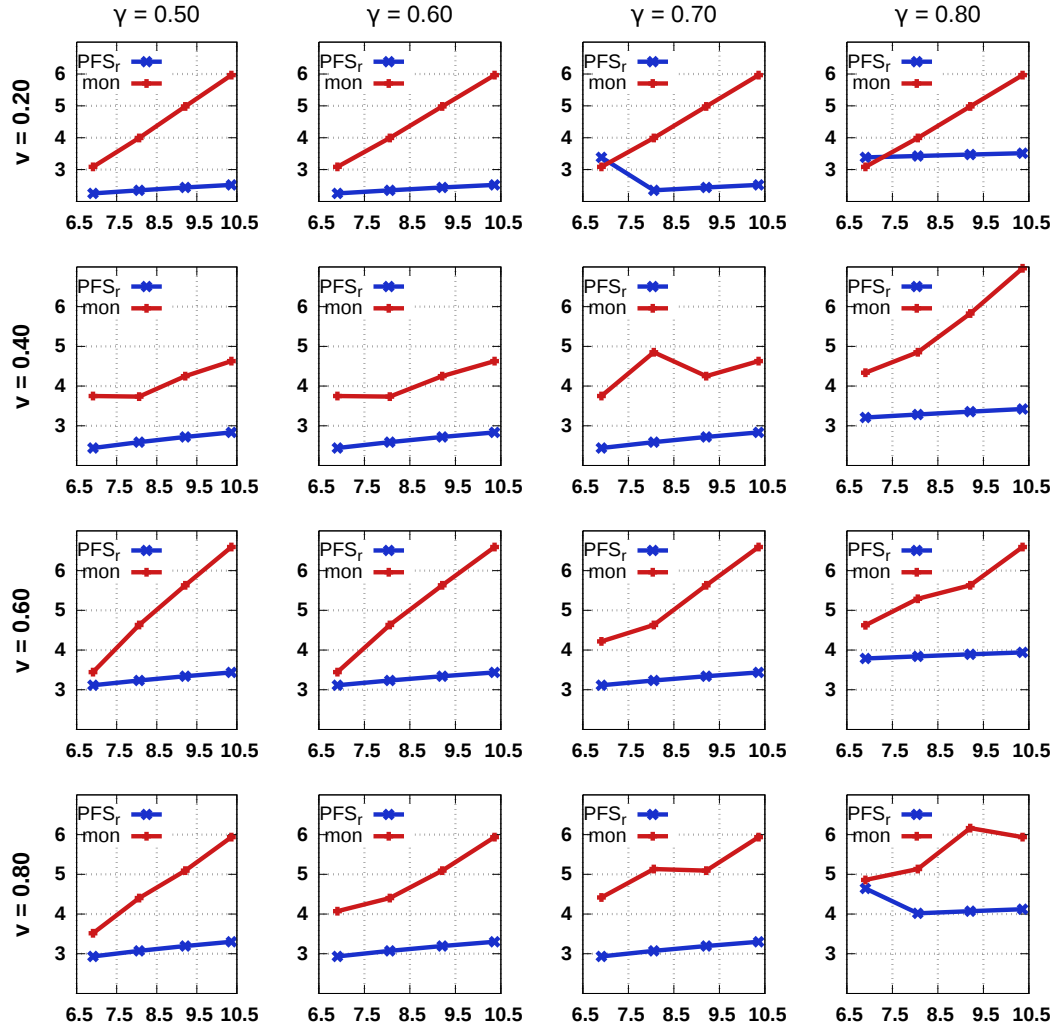

Figure 3: Regret curves for  $PFS_r$  and  $mon$  for different values of  $v$  and  $\gamma$ . The value of  $\gamma$  is not known to the algorithms.

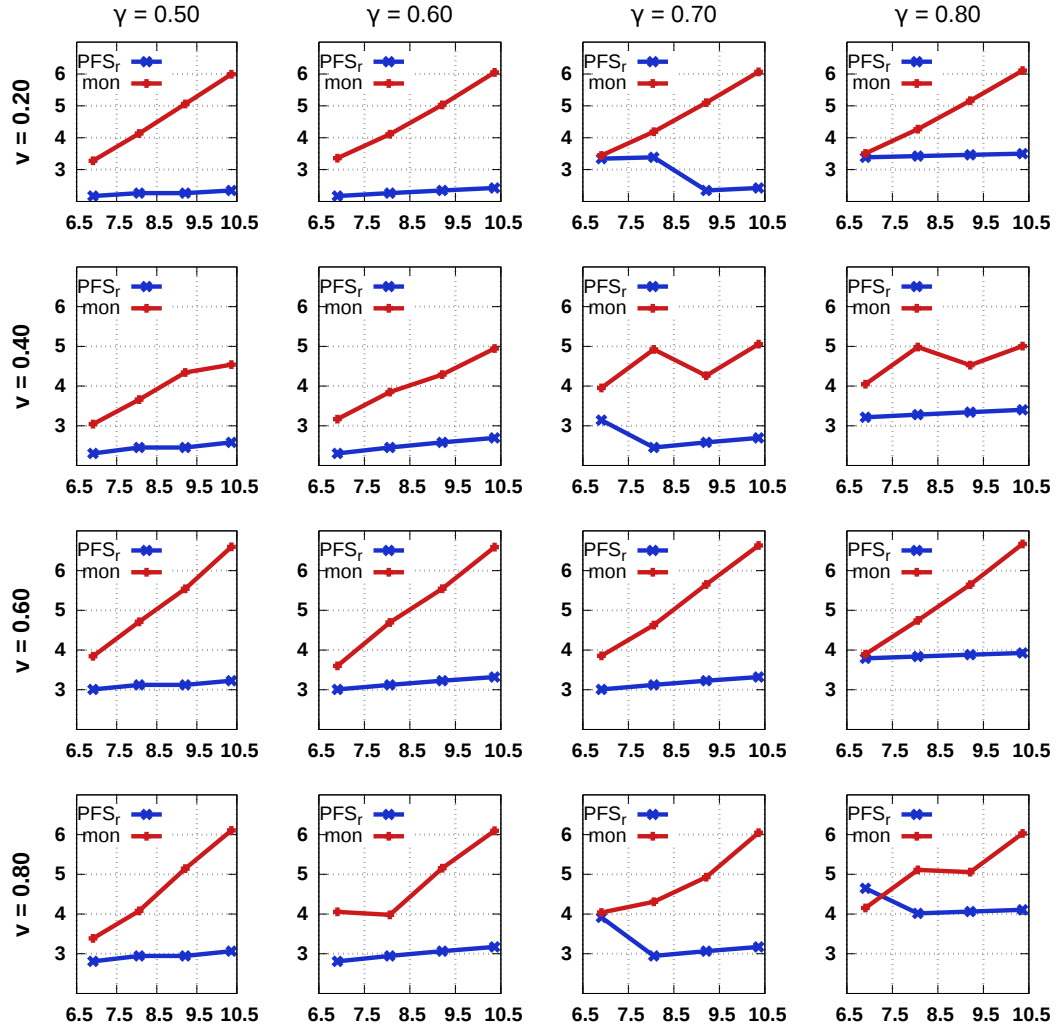

Figure 4: Regret curves for  $PFS_r$  and  $mon$  for different values of  $v$  and  $\gamma$ . The value of  $\gamma$  is known to both algorithms.
